## Syncope and subsequent traffic crash: A responsibility analysis

John A Staples, MD MPH ([john.staples@ubc.ca](mailto:john.staples@ubc.ca)) [1, 2]

Shannon Erdelyi, MSc ([shannonerdelyi@gmail.com](mailto:shannonerdelyi@gmail.com)) [3]

Ketki Merchant, MSc MBBS ([aquanut.nut325@gmail.com](mailto:aquanut.nut325@gmail.com)) [1]

Candace Yip, BSc ([yip.candace@gmail.com](mailto:yip.candace@gmail.com)) [1]

Mayesha Khan, MA ([mayesha.khan@ubc.ca](mailto:mayesha.khan@ubc.ca)) [1]

Donald A Redelmeier, MD ([dar@ices.on.ca](mailto:dar@ices.on.ca)) [4,5]

Herbert Chan, PhD ([herbert.chan@ubc.ca](mailto:herbert.chan@ubc.ca)) [3]

Jeffrey R Brubacher, MD ([jeff.brubacher@ubc.ca](mailto:jeff.brubacher@ubc.ca)) [2, 3]

[1] Department of Medicine, University of British Columbia, Vancouver, Canada

[2] Centre for Clinical Epidemiology & Evaluation, Vancouver, Canada

[3] Department of Emergency Medicine, University of British Columbia, Vancouver, Canada

[4] Sunnybrook Research Institute, Toronto, Canada

[5] Department of Medicine, University of Toronto, Toronto, Canada

Correspondence: John A Staples, MD MPH  
VGH Research Pavilion, Room 276  
828 West 10th Avenue, Vancouver BC V5Z1M9 Canada  
e-mail: [john.staples@ubc.ca](mailto:john.staples@ubc.ca)

Study nickname: Syncope-MVC\_resp

Abstract word count: 244/250

Manuscript word count: 2998/3000

References: 39/40

Tables/Figures: 6/6

**Author contributions:** JS, SE, HC and JB were responsible for study concept. JS, SE, DR, HC and JB contributed to study design. JS, JB, HC, and SE were responsible for acquisition of the data. KM, CY, and JS performed the chart review. SE had full access to all study data was responsible for the integrity of the data and the accuracy of the data analysis. JS and MK were responsible for drafting the manuscript. All authors were responsible for critical revision of the manuscript.

**Funding sources:** This study was supported by the Canadian Institutes of Health Research (grant number PJT-148849). JS' salary was supported by the Vancouver Coastal Health Research Institute and by a Health Professional-Investigator Award from Michael Smith Health Research

BC. JB was supported by Michael Smith Health Research BC and the British Columbia Emergency Medicine Network. Funding organizations were not involved in the design and conduct of the study; collection, management, analysis and interpretation of the data; or preparation, review and approval of this manuscript.

**Competing interests:** All authors report no competing interests.

## Abstract

**Background:** Physicians are often asked to counsel patients about driving safety after syncope, yet little empirical data guides such advice.

**Methods:** We identified a population-based retrospective cohort of 9,507 individuals with a driver license who were discharged from any of six urban emergency departments (EDs) with a diagnosis of 'syncope and collapse'. We examined all police-reported crashes that involved a cohort member as a driver and occurred between 1 January 2010 and 31 December 2016. We categorized crash-involved drivers as 'responsible' or 'non-responsible' for their crash using detailed police-reported crash data and a validated responsibility scoring tool. We then used logistic regression to test the hypothesis that recent syncope was associated with driver responsibility for crash.

**Results:** Over the 7-year study interval, cohort members were involved in 475 police-reported crashes: 210 drivers were deemed responsible and 133 drivers were deemed non-responsible for their crash; the 132 drivers deemed to have indeterminate responsibility were excluded from further analysis. An ED visit for syncope occurred in the three months leading up to crash in 11 crash-responsible drivers and in 5 crash-non-responsible drivers, suggesting that recent syncope was not associated with driver responsibility for crash (adjusted odds ratio, 1.31; 95%CI, 0.40-4.74;  $p=0.67$ ). However, all drivers with cardiac syncope were deemed responsible, precluding calculation of an odds ratio for this important subgroup.

**Conclusions:** Recent syncope was not significantly associated with driver responsibility for traffic crash. Clinicians and policymakers should consider these results when making fitness-to-drive recommendations after syncope.

*Keywords:* Syncope [MeSH]; Traffic Crashes; Automobile Driving [MeSH]; Injury; Trauma; Responsibility analysis; Culpability analysis.

## Key Messages

- **What is already known on this topic:** Clinicians are often asked to counsel patients about driving safety after syncope, yet little empirical data guides such advice.
- **What this study adds:** In contrast to prior studies, we found no significant association between an emergency department visit for syncope and driver responsibility for a subsequent motor vehicle crash.
- **How this study might affect research, practice or policy:** These findings might reassure clinicians, patients and policymakers that current driving restrictions after first-episode syncope adequately mitigate the risk of subsequent crash.

## Introduction

Syncope is characterized by a transient loss of consciousness and postural tone, symptoms incompatible with the safe operation of a motor vehicle.<sup>1</sup> One in three people experience syncope over their lifetime and 9% of patients experience another syncope within one year.<sup>2,3</sup> Driving safety after syncope has long fascinated clinicians, policymakers and the public because the compelling mental image of an incapacitated driver careening into oncoming traffic makes obvious that the risk of injury is borne by all road users (not just the incapacitated driver).<sup>4,5</sup> As a result, physicians are often asked to counsel patients about driving safety after syncope and, in some jurisdictions, clinicians must report such events to driver licensing authorities.<sup>6,7</sup>

Most prior studies of syncope and driving are limited by methodological flaws including lack of an appropriate control group, bias from crash self-reporting, insufficient sample size, and limited applicability to patients typically seen in clinical practice.<sup>8,9,10</sup> Two recently published population-based studies address many of these limitations and together increased the number of patients in the published literature on syncope and driving by 26-fold.<sup>11</sup> A Danish study found that 41,039 individuals visiting a hospital or emergency department with first-episode syncope subsequently sustained crash injuries at nearly twice the rate observed in the general population.<sup>12</sup> In contrast, we found that 9,223 drivers visiting an emergency department in Canada for first-episode syncope had a risk of subsequent crash no different than 34,366 drivers with an emergency visit for a condition other than syncope.<sup>13</sup> These discordant results might be explained if the Canadian patients masked a post-syncope increase in *crash risk while driving* by reducing subsequent *road exposure* (the hours or miles driven per week).<sup>14</sup> Road exposure might

be reduced because of restrictions by driver licensing authorities, through physician warnings not to drive, or via driving self-restriction by concerned patients.<sup>15,16,17</sup> Understanding whether syncope patients are '*as safe as the average driver*' or '*low mileage drivers who are dangerous when on the road*' is particularly relevant for clinicians and policymakers making fitness-to-drive decisions, yet almost all studies on syncope and crash risk lack data on road exposure.

*Responsibility analysis* is a well-established method that inherently accounts for road exposure when evaluating risk factors for traffic crash.<sup>18,19,20</sup> When mitigating factors are present (e.g. icy roads, poor illumination, reckless driving by others) and the driver observed all applicable road laws, the crash is assumed to have occurred for reasons beyond the driver's control and the driver is deemed 'non-responsible' for the crash. When external mitigating factors are absent or when the driver violated road laws, the driver is deemed 'responsible' for the crash. Responsibility analyses automatically account for road exposure because all crash-involved drivers must have been driving at the time of the crash (**Appendix, Item S1**). Exposures present with greater frequency among responsible drivers are believed to increase crash risk (**Figure 1**). Intoxication<sup>19,20,21,22,23</sup>, distraction<sup>24</sup>, sleep deprivation<sup>25</sup> and other well-established risk factors for crash are associated with crash responsibility, highlighting the utility and face validity of responsibility analyses.

We sought to evaluate crash risks while accounting for the possibility that patients reduce their road exposure in the weeks after syncope. Accordingly, we conducted a responsibility analysis evaluating the association between syncope and subsequent motor vehicle crash.

## Methods

### Nested study design

We nested the responsibility analysis within a previously described population-based cohort study of patients with an emergency department visit for first-episode syncope.<sup>13</sup> The syncope cohort included individuals with a driver license who received a discharge diagnosis of 'syncope and collapse' during a visit to one of six urban EDs in British Columbia (BC), Canada, between 1 January 2010 and 31 December 2015. Individuals with age  $\leq 18$  years, a full BC driver license for  $< 1$  year, a prior emergency visit for syncope between 2007 and 2009, or an index hospitalization length-of-stay  $> 7$  days were excluded from the syncope cohort.

All syncope cohort members who were also involved as a driver in a police-attended crash between 1 January 2010 and 31 December 2016 were evaluated as part of the responsibility analysis. We excluded: i) crashes occurring on the date the syncope ED visit because the temporal sequence of syncope and crash was often ambiguous; ii) commercial vehicle crashes; and iii) crashes for which we had  $< 1$  year of administrative health data to identify exposures and confounders. Individuals could contribute to the analysis more than once if they were involved in multiple eligible crashes.

### Study data

We obtained police-reported crash data for all police-attended crashes involving a cohort member as a driver.<sup>27</sup> Police in BC attend all fatal crashes, most serious injury crashes and some crashes involving property damage only. The attending officer completes a structured collision investigation report with detailed information on road type, driving conditions, vehicle condition,

crash configuration, the pre-collision action of each vehicle, unlawful or unsafe driving by each crash-involved driver, and the identity of each driver involved in the crash.<sup>28</sup>

We linked police-reported crash data to medical records, administrative health data, and driving history to establish exposure status and to account for potential confounders.<sup>13</sup> All syncope visits for cohort members were identified using administrative health data. Trained abstractors (KM, CY) reviewed all medical records from each cohort member's first syncope ED visit to confirm that syncope occurred and to determine the most likely etiology of syncope.<sup>13</sup> We used province-wide individual-level longitudinal administrative health services data to assess comorbidities and prescription medication use at the time of index crash (**Item S2**).<sup>26,27</sup> Comorbidities were identified using hospitalizations and physician visits in a 1-year lookback interval (**Item S3**). Prescription medication use was identified using prescription fills dispensed in a 60-day lookback interval.<sup>27</sup> Because of the design of the original cohort study, Data Stewards only permitted release of administrative health data from 5 years prior to and 1 year following the first syncope ED visit. Driving history was established using data from the Insurance Corporation of British Columbia (ICBC), the sole provider of mandatory basic automobile insurance for all vehicles registered in BC and the sole provider of driver licensing services for all drivers licensed in BC. We used these data to establish drivers' licensing details (e.g. license type; issuance, suspension, and expiry dates), prior traffic contraventions (e.g. for alcohol, speeding, or distracted driving), and crash history in a 5-year lookback interval from index crash.<sup>26,27</sup>

### Responsibility scoring



We used a validated scoring tool and police-reported crash data to deem crash-involved drivers 'responsible', 'non-responsible', or of 'indeterminate responsibility' for their crash.<sup>21,28,27</sup> The scoring tool assesses 7 factors (road type, driving conditions, vehicle condition, road law obedience, driving task involved, collision type, and contributions from other parties) to determine the degree to which external factors contributed to the crash.<sup>28</sup> Scores for each factor are summed to yield a total score between 7 and 35. Low scores ( $\leq 13$ ) indicate few external factors contributed to the crash, and the driver is thus deemed 'responsible' for the crash. Drivers scoring between 13.1 and 15.9 are deemed to have 'indeterminate responsibility' and are removed from the analysis. High scores ( $\geq 16$ ) indicate that external factors contributed substantially to the crash and the driver is therefore deemed 'non-responsible' for the crash. Crash responsibility is established independent of any criminal, civil or insurance-based determination of fault. Non-responsible drivers are assumed to be 'randomly selected' by events beyond their control (i.e. they are not the cause of the crash); they are believed to represent drivers who are on the road at the same time but are not involved in the crash.<sup>29</sup> Responsibility analyses thus generate risk estimates similar to standard roadside case-control studies that compare crash-involved drivers to randomly selected, non-crash-involved, 'average' drivers.<sup>30,31</sup>

## Analysis

As in a typical case-control study, we used logistic regression to evaluate the association between crash responsibility (outcome; 'responsible'=1, 'non-responsible'=0) and prior ED visit for syncope (exposure; ED visit for syncope present=1, no visit for syncope=0; **Figure 1**). For our primary analysis, we selected a 3-month exposure lookback period because most post-syncope driving restriction are between 1 week and 3 months in duration. We adjusted for

potential confounders present at the time of crash: Driver sex, age group, and residential neighbourhood income quintile; history of cardiovascular disease, cardiac pacemaker implantation, cardioverter-defibrillator implantation, diabetes, alcohol misuse, or other substance misuse; Charlson Comorbidity Index  $\geq 2$ ; number of physician visits and overnight hospital admissions in the prior year; number of distinct prescription medications and any prescription fills for benzodiazepines or for opioids; full driver license versus a learner or novice license at the time of crash; documented breath alcohol positivity or police suspicion of alcohol or drug impairment at the time of crash; season in which the crash occurred; the annual proportion of all crash-involved drivers in BC deemed responsible in crash year; and the proportion of days insured, prior contraventions, and crash history of the driver in a 5-year lookback (**Item S4**).

Subgroup analyses focused on groups relevant to clinicians asked to provide driving advice after syncope. Sensitivity analyses evaluated alternate study intervals, exposure lookback intervals, and responsibility score categorizations. We used R version 4.0, two-sided tests, and p-values  $< 0.05$  to establish statistical significance.

### Ethics

The University of British Columbia Clinical Research Ethics Board approved the study and waived the requirement for individual consent (H16-02043). Data were de-identified before release to investigators. It was not appropriate or possible to involve patients or the public in the design, or conduct, or reporting, or dissemination plans of our research. All inferences, opinions, and conclusions drawn are those of the authors and do not reflect the opinions or policies of the Data Stewards.

## Results

The syncope cohort included 9,507 drivers involved in 475 police-reported crashes over the 7-year study interval (**Figure 2**). Crash-involved drivers had a median age of 52 years and typically possessed a full driver license; the majority held an active vehicle insurance policy, received at least one contravention, and were involved in at least one previous crash in the 5 years prior to the index crash (**Table 1**). Among crash-involved drivers, 210 were deemed 'responsible' and 133 were deemed 'non-responsible' for their crash; 132 drivers deemed to have indeterminate responsibility were excluded from the main analysis.

Differences between responsible and non-responsible drivers supported the validity and intuitive appeal of responsibility analysis (**Table 1**). Established risk factors for crash that do not influence responsibility scores were more common among crash-responsible drivers than among non-responsible drivers (e.g., male sex, a history of prior traffic contraventions, alcohol as a contributing factor, distraction/inattention as a contributing factor; **Items S5 & S6**). The proportion of crash-involved drivers deemed responsible was similar to that within the largest prior responsibility study (44% versus 46%, respectively), suggesting missing data on 'contributions from other parties' had a limited effect on overall responsibility scores.<sup>27</sup>

An ED visit for syncope occurred in the three months prior to crash for 11 of the 210 crash-responsible drivers (5.2%) and for 5 of the 133 crash-non-responsible drivers (3.8%), suggesting syncope was not associated with subsequent crash responsibility (adjusted odds ratio, 1.31; 95%CI, 0.40-4.74;  $p=0.67$ ). Results of subgroup analyses were generally consistent with

the results of the main analysis, with no evidence of an association between syncope and crash responsibility even among subgroups likely to be at higher risk of adverse events after syncope (i.e. age  $\geq 56$  years, San Francisco syncope rule  $\geq 1$ ; **Table 2; Item S7**). However, among drivers with a syncope ED visit in the three months prior to crash, all individuals with cardiac syncope and all individuals hospitalized directly from the syncope ED visit were deemed responsible for their crash, precluding calculation of odds ratios (**Table 2**). It remains possible that these specific types of syncope are associated with increased crash responsibility. Our overall results were robust on sensitivity analyses that examined different exposure lookback intervals, responsibility score categorizations and study intervals (**Table 3; Figure 3**).

## Discussion

Within a population-based cohort of 9,507 individuals with an ED visit for syncope, we identified 475 police-reported crashes over a 7-year study interval. We found that an ED visit for syncope was not associated with subsequent crash responsibility, suggesting that individuals are not more likely to cause a subsequent traffic collision in the months following an episode of syncope. Subgroup and sensitivity analyses supported the conclusions of the main analysis. However, our results were somewhat imprecise because crashes are rare, suggesting more research is required before patients, clinicians and policymakers can be confident that syncope is not associated with clinically meaningful increases in crash responsibility.

Our findings advance the scientific understanding of syncope and crash risk by complementing and enhancing the interpretation of prior studies.<sup>11</sup> Using the syncope cohort described above, we recently reported that 9,223 individuals visiting the ED for syncope had a

crash-free survival no different than 34,366 controls visiting the ED for other conditions (0-30 days, hazard ratio 0.93, 95%CI 0.78-1.11; 30-90 days, hazard ratio 1.07, 95%CI 0.84-1.36).<sup>13</sup>

Using a similar cohort design, Numé and colleagues reported that 41,039 Danish patients visiting the ED or hospital for syncope had a modest increase in the rate of traffic injuries relative to the general population ( $\leq 1$  month, rate ratio 1.25, 95%CI 0.94-1.67; 1-3 months, rate ratio 1.56, 95%CI 1.30-1.87).<sup>12</sup> An older case-control study in Washington State evaluated 234 crash-injured drivers aged  $\geq 65$  years and 446 matched uninjured controls, finding that driver injury was not associated with antecedent syncope in a 3-year lookback interval (odds ratio 1.8, 95%CI 0.7-5.0).<sup>32</sup> The current study is unique among this group in that it uses a design which accounts for road exposure; that it produced similar effect estimates suggests bias from unmeasured changes in road exposure is minimal in this population.

However, our results contrast with the only other published study that compared crash responsibility among syncope patients and controls. Using crash responsibility assigned by the investigating police officer, investigators examined a cohort of 7,750 drivers hospitalized in Maryland between 1994 and 1996 for crash injury and found that crash responsibility was strongly associated with a history of syncope (odds ratio, 4.06; 95%CI, 2.36-7.63); the point estimate somewhat implausibly exceeded that reported for 'alcohol dependence syndrome' (odds ratio, 2.63; 95%CI, 2.01-3.49).<sup>33</sup> Limitations of this study include uncertain validity of officer-assigned crash responsibility, lack of confirmation of the diagnosis of syncope, uncertain timing between syncope and crash, adjustment only for driver age, issues related to multiple hypothesis testing, and incomplete reporting of study results. The results of our responsibility analysis might reassure decision-makers that syncope patients are less likely to crash than the Maryland study

suggests. Other studies on syncope and crash risk either fail to include a control group or simply compare to publicly reported crash risks in the general population.<sup>11,14</sup>

Our findings have implications for clinicians and policymakers charged with making recommendations about fitness-to-drive after syncope. Fitness-to-drive decisions typically depend on the magnitude, not merely the presence, of increased risk: In many jurisdictions, non-zero blood alcohol concentrations (BACs) that double crash risk are not subject to any penalty (i.e. BAC <0.05%); BACs that more than quadruple crash risk only receive a fine or license suspension (i.e. BAC 0.05-0.79%); and only BACs that increase crash risk by more than 7-fold are subject to criminal charges (i.e. BAC >0.08%).<sup>34,35,36</sup> The 1.3-fold increase in crash responsibility we observed does not justify new driving restrictions after a syncope ED visit. However, we were unable to exclude a 4-fold increase in risk, suggesting contemporary restrictions for individuals at the highest risk of syncope recurrence while driving are prudent as further research is performed.

The use of responsibility analysis is a unique strength of our study that allowed us to account for road exposure while avoiding selection biases that often characterise recruitment of crash-free control drivers.<sup>30</sup> Our study has many other strengths: We focused on crashes occurring within a population-based cohort; we established crash responsibility objectively using police crash reports and a validated scoring tool; we confirmed the presence and etiology of syncope by performing a structured medical record abstraction for syncope ED visits; and we had detailed data allowing us to account for baseline comorbidities, prescription medication use and driver history. Our study also has limitations. First, our findings only apply to individuals

who continue to drive after a first ED visit for syncope and not to individuals who subsequently ceased driving by choice, following physician advice, or by legal obligation. However, driving cessation after first-episode syncope is rare because the most common types of syncope such as vasovagal or orthostatic syncope are typically not subject to any driving restriction; our results thus apply to most syncope patients seen in the emergency department. Second, our findings are subject to the unverifiable 'randomness assumption' of responsibility analysis which posits that non-responsible crashes are random events caused by external factors.<sup>37</sup> Nevertheless, prior studies provide some reassurance that responsibility analyses appropriately identify risk factors for crash.<sup>18-20,23-27,29</sup> Third, we lacked data on the 'contribution from other drivers', biasing responsibility scores downward and effect estimates toward the null. Reassuringly, the proportion of our crash cohort deemed responsible aligns with prior studies, suggesting the missing data had a limited effect on our results. Fourth, we had incomplete data on alcohol and non-prescription drug use. We partially accounted for this by adjusting for police-reported alcohol or drug impairment at the time of crash, and by adjusting for medical visits for substance misuse in the year prior to crash. Fifth, we were unable to calculate odds ratios in some higher risk syncope subgroups (e.g. cardiac syncope, hospitalized at time of ED visit for syncope), and it remains possible that these or other subgroups of syncope patients are more likely to cause a subsequent crash. Despite these limitations, our study represents a substantial contribution to the limited available evidence that informs fitness-to-drive decisions after syncope.<sup>38</sup>

Medical driving restrictions can substantially decrease patients' quality-of-life.<sup>39</sup> Our findings suggest that individuals with a recent syncope ED visit are no more likely to be

responsible for serious motor vehicle crashes than are comparable patients with no recent syncope ED visit, and that expanded driving restrictions after syncope are not warranted.



**Table 1: Characteristics of crash-involved drivers**

| Characteristic                   | Drivers deemed responsible for crash<br>n = 210 | Drivers deemed non-responsible for crash<br>n = 133 | Drivers with indeterminate responsibility<br>n = 132 | p-value (responsible vs. non-responsible) |
|----------------------------------|-------------------------------------------------|-----------------------------------------------------|------------------------------------------------------|-------------------------------------------|
| <b>Demographics</b>              |                                                 |                                                     |                                                      |                                           |
| Median age (y) [Q1, Q3]          | 52 [32, 73]                                     | 49 [32, 65]                                         | 53 [34, 70]                                          | 0.10                                      |
| Male sex                         | 132 (62.9%)                                     | 67 (50.4%)                                          | 69 (52.3%)                                           | 0.03                                      |
| Neighborhood income quintile     |                                                 |                                                     |                                                      | 0.70                                      |
| First (poorest)                  | 36 (17.1%)                                      | 30 (22.6%)                                          | 22 (16.7%)                                           |                                           |
| Second                           | 42 (20.0%)                                      | 29 (21.8%)                                          | 28 (21.2%)                                           |                                           |
| Third                            | 38 (18.1%)                                      | 23 (17.3%)                                          | 19 (14.4%)                                           |                                           |
| Fourth                           | 41 (19.5%)                                      | 22 (16.5%)                                          | 26 (19.7%)                                           |                                           |
| Fifth (wealthiest)               | 53 (25.2%)                                      | 29 (21.8%)                                          | 36 (27.3%)                                           |                                           |
| Rural residence                  | 33 (15.7%)                                      | 18 (13.5%)                                          | 18 (13.6%)                                           | 0.69                                      |
| <b>Medical history</b>           |                                                 |                                                     |                                                      |                                           |
| ≥1 hospitalization in prior year | 28 (13.3%)                                      | 16 (12.0%)                                          | 15 (11.4%)                                           | 0.85                                      |
| ≥7 physician visit in prior year | 139 (66.2%)                                     | 92 (69.2%)                                          | 82 (62.1%)                                           | 0.65                                      |
| Charlson co-morbidity score ≥2   | 17 (8.1%)                                       | 14 (10.5%)                                          | 8 (6.1%)                                             | 0.57                                      |
| <b>Comorbidities</b>             |                                                 |                                                     |                                                      |                                           |
| Hypertension                     | 43 (20.5%)                                      | 25 (18.8%)                                          | 23 (17.4%)                                           | 0.81                                      |
| Cardiovascular disease           | 25 (11.9%)                                      | 12 (9.0%)                                           | 14 (10.6%)                                           | 0.51                                      |
| Cardiac arrhythmia               | 15 (7.1%)                                       | 7 (5.3%)                                            | 8 (6.1%)                                             | 0.64                                      |
| COPD                             | 12 (5.7%)                                       | 12 (9.0%)                                           | < 5                                                  | 0.34                                      |
| Diabetes                         | 8 (3.8%)                                        | 7 (5.3%)                                            | < 5                                                  | 0.71                                      |
| Cancer                           | 5 (2.4%)                                        | 5 (3.8%)                                            | 5 (3.8%)                                             | 0.68                                      |
| Alcohol misuse                   | 11 (5.2%)                                       | < 5                                                 | < 5                                                  | 0.28                                      |
| Other substance misuse           | 10 (4.8%)                                       | < 5                                                 | 0                                                    | 0.08                                      |
| <b>Number of medications</b>     |                                                 |                                                     |                                                      |                                           |
| 0 or 1                           | 126 (60.0%)                                     | 94 (44.8%)                                          | 97 (46.2%)                                           | 0.06                                      |
| ≥2                               | 84 (40.0%)                                      | 39 (29.3%)                                          | 35 (26.5%)                                           |                                           |
| <b>Selected medications</b>      |                                                 |                                                     |                                                      |                                           |
| Benzodiazepines                  | 16 (7.6%)                                       | 10 (7.5%)                                           | 6 (4.5%)                                             | 1.00                                      |
| Opioids                          | 18 (8.6%)                                       | 8 (6.0%)                                            | 9 (6.8%)                                             | 0.51                                      |
| <b>Driving history</b>           |                                                 |                                                     |                                                      |                                           |
| <b>License type</b>              |                                                 |                                                     |                                                      |                                           |
| Learner                          | < 5                                             | < 5                                                 | 0                                                    | 0.54                                      |
| Novice                           | 31 (14.8%)                                      | 15 (11.3%)                                          | 19 (14.4%)                                           |                                           |
| Full                             | 176 (83.8%)                                     | 117 (88.0%)                                         | 113 (85.6%)                                          |                                           |
| Driver experience (y) [Q1, Q3]   | 20 [8, 39]                                      | 18 [7, 35]                                          | 21 [9, 38]                                           | 0.37                                      |
| Active license in prior 5y       | 210 (100.0%)                                    | 133 (100.0%)                                        | 132 (100.0%)                                         | -                                         |
| Insurance policy in prior 5y     | 178 (84.8%)                                     | 115 (86.5%)                                         | 111 (84.1%)                                          | 0.78                                      |
| ≥1 crash in prior 5y             | 130 (61.9%)                                     | 89 (66.9%)                                          | 77 (58.3%)                                           | 0.41                                      |

|                                     |             |            |            |       |
|-------------------------------------|-------------|------------|------------|-------|
| <b>≥1 contravention in prior 5y</b> | 143 (68.1%) | 69 (51.9%) | 74 (56.1%) | 0.004 |
| Alcohol-related                     | 19 (9.0%)   | 8 (6.0%)   | 8 (6.1%)   | 0.42  |
| Speed-related                       | 69 (32.9%)  | 26 (19.5%) | 37 (28.0%) | 0.01  |
| Distraction-related                 | 11 (5.2%)   | < 5        | < 5        | 0.48  |

**Legend:** Socioeconomic status and rurality based on the first three digits of residential postal code. Comorbidities considered present if  $\geq 1$  hospitalization or  $\geq 2$  MSP visits within a 1-year covariate lookback period. Medications considered present if prescription period (defined by medication dispensation date and days dispensed) overlapped with the 60-day period prior to index crash. Driver experience defined as the median years since granted full driver license.

**Table 2: Subgroup analyses**

| <b>Subgroup</b>                                              | <b>Proportion deemed responsible for crash among drivers <i>with</i> an ED visit for syncope in the 3 months prior to crash, % (counts)</b> | <b>Proportion deemed responsible for crash among drivers <i>without</i> an ED visit for syncope in the 3 months prior to crash, % (counts)</b> | <b>Adjusted odds ratio (95% CI)</b> | <b>p-value</b> |
|--------------------------------------------------------------|---------------------------------------------------------------------------------------------------------------------------------------------|------------------------------------------------------------------------------------------------------------------------------------------------|-------------------------------------|----------------|
| <b>Subgroups defined by driver characteristics</b>           |                                                                                                                                             |                                                                                                                                                |                                     |                |
| <b>Age (years)</b>                                           |                                                                                                                                             |                                                                                                                                                |                                     |                |
| ≤35                                                          | 75.0% (<5)                                                                                                                                  | 57.7% (60/104)                                                                                                                                 | 2.09 (0.08, 85.22)                  | 0.66           |
| 36-55                                                        | 60.0% (<5)                                                                                                                                  | 62.2% (56/90)                                                                                                                                  | 2.83 (0.22, 54.24)                  | 0.44           |
| ≥56                                                          | 71.4% (5/7)                                                                                                                                 | 62.4% (83/133)                                                                                                                                 | 0.82 (0.11, 8.55)                   | 0.85           |
| <b>Sex</b>                                                   |                                                                                                                                             |                                                                                                                                                |                                     |                |
| Male                                                         | 70.0% (7/10)                                                                                                                                | 66.1% (125/189)                                                                                                                                | 1.37 (0.27, 8.00)                   | 0.71           |
| Female                                                       | 66.7% (<5)                                                                                                                                  | 53.6% (74/138)                                                                                                                                 | 0.83 (0.09, 8.81)                   | 0.87           |
| <b>Cardiovascular disease</b>                                |                                                                                                                                             |                                                                                                                                                |                                     |                |
| Present                                                      | 100% (<5)                                                                                                                                   | 65.7% (23/35)                                                                                                                                  | *                                   | *              |
| Absent                                                       | 64.3% (9/14)                                                                                                                                | 60.3% (176/292)                                                                                                                                | 1.20 (0.34, 4.58)                   | 0.78           |
| <b>Subgroups defined by syncope ED visit characteristics</b> |                                                                                                                                             |                                                                                                                                                |                                     |                |
| <b>Diagnostic confidence</b>                                 |                                                                                                                                             |                                                                                                                                                |                                     |                |
| Syncope definite or likely                                   | 61.5% (8/13)                                                                                                                                | 60.9% (199/327)                                                                                                                                | 0.92 (0.25, 3.55)                   | 0.90           |
| Syncope possible or absent                                   | 100.0% (<5)                                                                                                                                 | 60.9% (199/327)                                                                                                                                | *                                   | *              |
| <b>Syncope subtype</b>                                       |                                                                                                                                             |                                                                                                                                                |                                     |                |
| Vasovagal                                                    | 70.0% (7/10)                                                                                                                                | 60.9% (199/327)                                                                                                                                | 1.55 (0.37, 8.13)                   | 0.56           |
| Orthostatic                                                  | 33.3% (<5)                                                                                                                                  | 60.9% (199/327)                                                                                                                                | 0.11 (0.00, 2.62)                   | 0.25           |
| Cardiac                                                      | 100% (<5)                                                                                                                                   | 60.9% (199/327)                                                                                                                                | *                                   | *              |
| Other                                                        | 100% (<5)                                                                                                                                   | 60.9% (199/327)                                                                                                                                | *                                   | *              |
| <b>San Francisco syncope rule</b>                            |                                                                                                                                             |                                                                                                                                                |                                     |                |
| Positive (score ≥ 1)                                         | 60.0% (6/10)                                                                                                                                | 60.9% (199/327)                                                                                                                                | 0.85 (0.20, 3.80)                   | 0.82           |
| Negative (score = 0)                                         | 83.3% (5/6)                                                                                                                                 | 60.9% (199/327)                                                                                                                                | 3.68 (0.44, 79.42)                  | 0.28           |
| <b>Hospitalized on index ED visit</b>                        |                                                                                                                                             |                                                                                                                                                |                                     |                |
| Yes                                                          | 100% (<5)                                                                                                                                   | 60.9% (199/327)                                                                                                                                | *                                   | *              |
| No                                                           | 66.7% (10/15)                                                                                                                               | 60.9% (199/327)                                                                                                                                | 1.06 (0.32, 3.91)                   | 0.93           |

**Legend:** Subgroups were defined by: a) driver characteristics at the time of crash, or b) comparing mutually exclusive exposure groups (e.g. ED visit for syncope in which abstractors deemed syncope 'definite or likely') to the non-exposed referent group used in the primary analysis (e.g. no ED visit for syncope). \* odds ratios could not be estimated because all exposed drivers in the strata were deemed responsible for their crash.

**Table 3: Sensitivity analyses**

| <b>Analysis</b>                                                      | <b>Adjusted odds ratio<br/>(95% CI)</b> | <b>p-value</b> |
|----------------------------------------------------------------------|-----------------------------------------|----------------|
| <b>Alternate exposure lookback intervals (months prior to crash)</b> |                                         |                |
| 0 - 1 month                                                          | 1.80 (0.14, 45.37)                      | 0.66           |
| 0 - 3 months (main analysis)                                         | 1.31 (0.40, 4.74)                       | 0.67           |
| 0 - 6 months                                                         | 1.19 (0.58, 2.51)                       | 0.64           |
| 0 - 9 months                                                         | 0.95 (0.50, 1.86)                       | 0.89           |
| 0 - 12 months                                                        | 0.97 (0.53, 1.77)                       | 0.91           |
| <b>Alternate categorization of responsibility score</b>              |                                         |                |
| ≤12 versus ≥17                                                       | 0.65 (0.15, 3.19)                       | 0.57           |
| ≤13 versus ≥16 (main analysis)                                       | 1.31 (0.40, 4.74)                       | 0.67           |
| ≤14 versus ≥15                                                       | 1.49 (0.51, 4.71)                       | 0.48           |
| <b>Alternate crash eligibility</b>                                   |                                         |                |
| 2010 - 2016 (main analysis)                                          | 1.31 (0.40, 4.74)                       | 0.67           |
| 2010 - 2015                                                          | 1.34 (0.41, 4.88)                       | 0.64           |

**Legend:** Longer exposure lookback intervals increased the proportion of crash-involved drivers 'exposed' to a prior ED visit for syncope and yielded narrower confidence intervals, but no interval suggested there was an association between syncope and crash responsibility. Similarly, our results were robust to changes in the responsibility score cut-offs used to define crash-responsible drivers and to alternate criteria used to define eligible crashes.

**Figure 1: Study schematic**

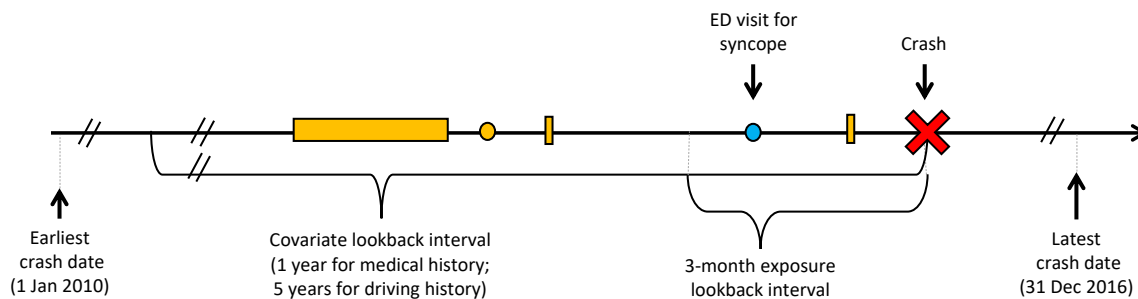

**Legend.** Time depicted from left to right. Lookback intervals are anchored on index crash date (red X). The main analysis considered a crash-involved driver 'exposed' if that driver had an ED visit for syncope (blue dot) in the 3 months prior to crash. Comorbidities, medications, and driving history are established using hospitalizations (horizontal orange rectangle), physician visits (orange circle) and contraventions (vertical orange rectangle) in the covariate lookback interval.

**Figure 2: Study flow diagram**

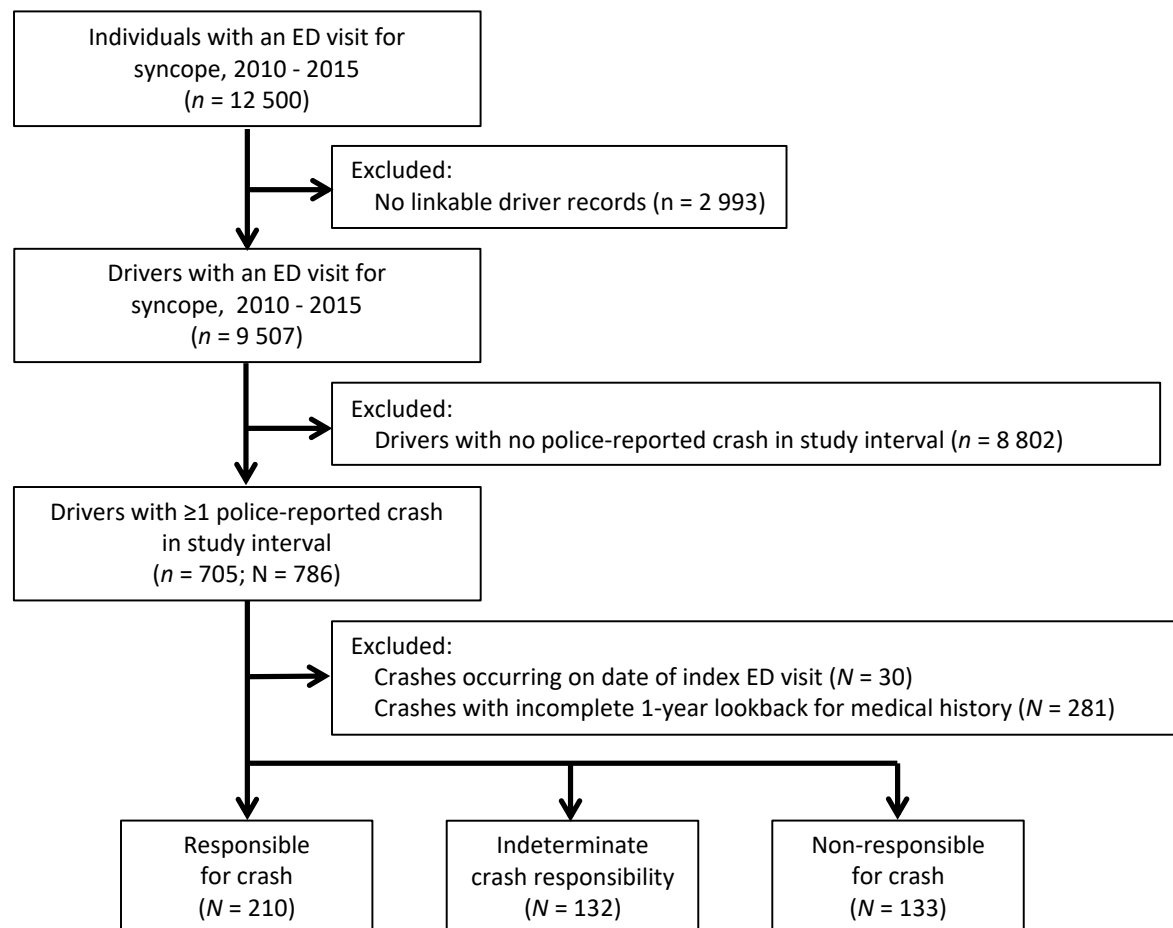

**Legend.** Drivers were included in analyses more than once if they were involved in multiple police-reported crashes over the study interval. No two drivers in the syncope cohort were involved in the same crash. *n* denotes unique drivers; *N* denotes unique driver-crash combinations; ED = emergency department.

**Figure 3: Forest plot of alternate exposure lookback intervals**

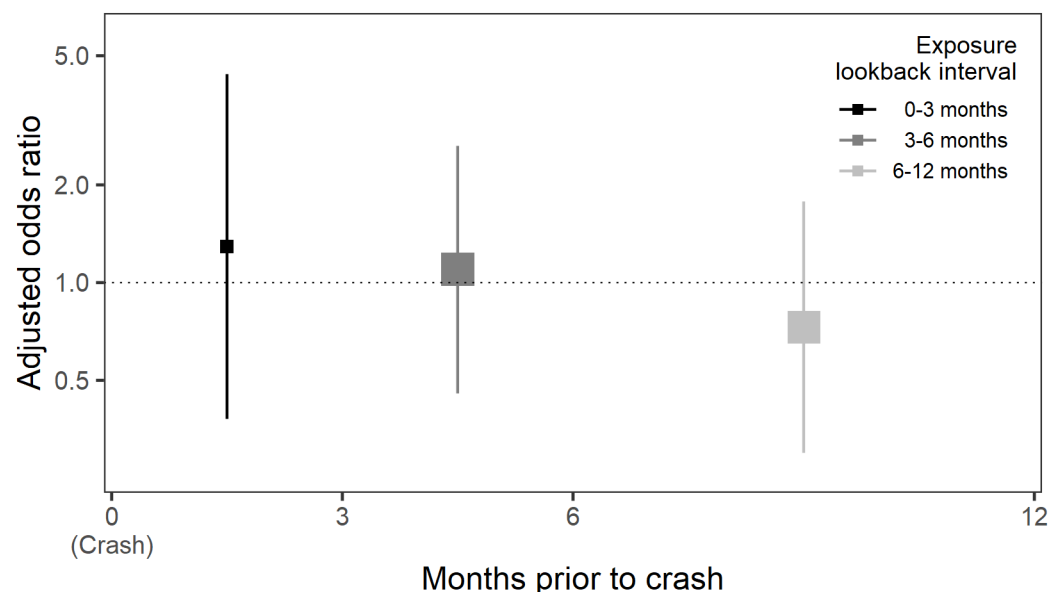

**Legend:** Forest plot of piecewise exposure lookback intervals (from left to right: 0-3 months; 3-6 months; 6-12 months). X-axis depicts the exposure lookback interval; Y-axis, the odds ratio for the association between syncope and crash responsibility; squares, the adjusted odds ratio point estimate (with size reflecting the inverse of the standard error); vertical lines, the 95% confidence interval.

## References

---

- 1 Guzman JC, Morillo CA. Syncope and driving. *Cardiol Clin* 2015;33:465-71.
- 2 Serletis A, Rose S, Sheldon AG, Sheldon RS. Vasovagal syncope in medical students and their first-degree relatives. *Eur Heart J* 2006;27: 1965-70.
- 3 Solbiati M, Casazza G, Dipaola F, Rusconi AM, Cernuschi G, Barbic F, Montano N, Sheldon RS, Furlan R, Costantino G. Syncope recurrence and mortality: a systematic review. *Europace*. 2014 Dec 4;17(2):300-8.
- 4 Redelmeier DA, Raza S. Syncope and the risk of a subsequent motor vehicle crash. *JAMA Intern Med*. 2016 Apr;176(4):510-1.
- 5 Refaat H. The contribution of medical conditions to passenger vehicle crashes. Washington, DC: National Highway Traffic Safety Administration, 2009.
- 6 Pomidor A, ed. Clinician's guide to assessing and counseling older drivers. 3rd ed. Washington, DC: National Highway Traffic Safety Administration, American Geriatrics Society, January 2016. (Report no. DOT HS 812 228.).
- 7 Margulescu AD, Anderson MH. A review of driving restrictions in patients at risk of syncope and cardiac arrhythmias associated with sudden incapacity: differing global approaches to regulation and risk. *Arrhythm Electrophysiol Rev*. 2019 May;8(2):90-98.
- 8 Writing Committee Members, Shen WK, Sheldon RS, Benditt DG, Cohen MI, Forman DE, Goldberger ZD, Grubb BP, Hamdan MH, Krahn AD, Link MS, Olshansky B, Raj SR, Sandhu RK, Sorajja D, Sun BC, Yancy CW. 2017 ACC/AHA/HRS guideline for the evaluation and management of patients with syncope: A report of the American College of Cardiology/American Heart Association Task Force on Clinical Practice Guidelines and the Heart Rhythm Society. *Heart Rhythm*. 2017 Aug;14(8):e155-e217.
- 9 Brignole M, Moya A, de Lange FJ, Deharo JC, Elliott PM, Fanciulli A, Fedorowski A, Furlan R, Kenny RA, Martín A, Probst V, Reed MJ, Rice CP, Sutton R, Ungar A, van Dijk JG; ESC Scientific Document Group. 2018 ESC Guidelines for the diagnosis and management of syncope. *Eur Heart J*. 2018 Jun 1;39(21):1883-1948.
- 10 Primary Writing Committee, Sandhu RK, Raj SR, Thiruganasambandamoorthy V, Kaul P, Morillo CA, Krahn AD, Guzman JC, Sheldon RS; Secondary Writing Committee, Banijamali HS, MacIntyre C, Manlucu J, Seifer C, Sivilotti M. Canadian Cardiovascular Society Clinical Practice Update on the Assessment and Management of Syncope. *Can J Cardiol*. 2020 Aug;36(8):1167-1177.
- 11 Chee JN, Simpson C, Sheldon RS, Dorian P, Dow J, Guzman J, Raj SR, Sandhu RK, Thiruganasambandamoorthy V, Green MS, Krahn AD, Plonka S, Rapoport MJ. A systematic



---

review of the risk of motor vehicle collision in patients with syncope. *Can J Cardiol.* 2021 Jan;37(1):151-161.

12 Numé AK, Gislason G, Christiansen CB, Zahir D, Hlatky MA, Torp-Pedersen C, Ruwald MH. Syncope and Motor Vehicle Crash Risk: A Danish Nationwide Study. *JAMA Intern Med.* 2016 Apr;176(4):503-10.

13 Staples JA, Erdelyi S, Merchant K, Yip C, Khan M, Redelmeier DA, Chan H, Brubacher JR. Syncope and the risk of subsequent motor vehicle crash: a population-based retrospective cohort study. *JAMA Intern Med.* 2022 Aug 1. doi: 10.1001/jamainternmed.2022.2865. Epub ahead of print. PMID: 35913711.

14 Tan VH, Ritchie D, Maxey C, Sheldon R; POST Investigators. Prospective assessment of the risk of vasovagal syncope during driving. *JACC Clin Electrophysiol.* 2016 Apr;2(2):203-208.

15 Redelmeier DA, Yarnell CJ, Thiruchelvam D, Tibshirani RJ. Physicians' warnings for unfit drivers and the risk of trauma from road crashes. *N Engl J Med.* 2012 Sep 27;367(13):1228-36.

16 Canadian Council of Motor Transport Administrators. National Safety Code Standard 6: Determining Driver Fitness in Canada, Edition 13. Ottawa, ON: The Council; Feb 2021.

17 Ono T, Yuki K, Awano-Tanabe S, Fukagawa K, Shimoyama M, Ozawa Y, Ozeki N, Shiba D, Tsubota K. Driving self-restriction and motor vehicle collision occurrence in glaucoma. *Optom Vis Sci.* 2015 Mar;92(3):357-64.

18 Smith HW, Popham RE. Blood alcohol levels in relation to driving. *Canadian Medical Association Journal.* 1951 Oct;65(4):325-8.

19 Drummer OH, Gerostamoulos D, Di Rago M, Woodford NW, Morris C, Frederiksen T, Jachno K, Wolfe R. Odds of culpability associated with use of impairing drugs in injured drivers in Victoria, Australia. *Accident Analysis & Prevention.* 2020 Feb 1;135:105389.

20 Brubacher JR, Chan H, Erdelyi S, Macdonald S, Asbridge M, Mann RE, Eppler J, Lund A, MacPherson A, Martz W, Schreiber WE. Cannabis use as a risk factor for causing motor vehicle crashes: a prospective study. *Addiction.* 2019 Sep;114(9):1616-26.

21 Pitt TM, Aucoin J, Nettel-Aguirre A, McCormack GR, Howard AW, Graff P, Rowe BH, Hagel BE. Adaptation of a Canadian responsibility scoring tool to Alberta police traffic collision report data. *Traffic Injury Prevention.* 2019 Mar 18;20(3):270-5.

22 de Carvalho HB, Andreuccetti G, Rezende MR, Bernini C, Silva JS, Leyton V, Greve JM. Alcohol and drug involvement in motorcycle driver injuries in the city of Sao Paulo, Brazil: Analysis of crash culpability and other associated factors. *Drug and Alcohol Dependence.* 2016 May 1;162:199-205.

23 Chihuri S, Li G. Use of prescription opioids and initiation of fatal 2-vehicle crashes. *JAMA Netw Open.* 2019 Feb 1;2(2):e188081.

24 Asbridge M, Brubacher JR, Chan H. Cell phone use and traffic crash risk: a culpability analysis. *Int J Epidemiol*. 2013 Feb;42(1):259-67.

25 Tefft BC. Acute sleep deprivation and culpable motor vehicle crash involvement. *Sleep*. 2018 Oct 1;41(10).

26 Staples JA, Erdelyi S, Moe J, Khan M, Chan H, Brubacher JR. Prescription opioid use among drivers in British Columbia, 1997-2016. *Inj Prev*. 2021 Dec;27(6):527-534.

27 Brubacher JR, Chan H, Erdelyi S, Zed PJ, Staples JA, Etminan M. Medications and risk of motor vehicle collision responsibility in British Columbia, Canada: a population-based case-control study. *Lancet Public Health*. 2021 Jun;6(6):e374-e385.

28 Brubacher JR, Chan H, Asbridge M. Development and validation of a crash responsibility scoring tool. *Traffic Injury Prevention*. 2012 May 1;13(3):219-29.

29 af Wahlberg AE. The relation of non-culpable traffic incidents to bus drivers' acceleration behavior. *J Safety Res*. 2008;39(1):41-6.

30 Voas RB, Yao J, Scherer M, Romano E, Lacey J. Methods for investigating crash risk: Comparing case control with responsibility analysis. *Traffic Inj Prev*. 2018;19(8):812-8.

31 Brubacher JR, Chan H, Erdelyi S, Macdonald S, Asbridge M, Mann RE, Eppler J, Lund A, MacPherson A, Martz W, Schreiber WE, Brant R, Pursell RA. Cannabis use as a risk factor for causing motor vehicle crashes: a prospective study. *Addiction*. 2019 Sep;114(9):1616-1626.

32 Koepsell TD, Wolf ME, McCloskey L, Buchner DM, Louie D, Wagner EH, Thompson RS. Medical conditions and motor vehicle collision injuries in older adults. *J Am Geriatr Soc*. 1994 Jul;42(7):695-700.

33 Dischinger PC, Ho SM, Kufera JA. Medical conditions and car crashes. *Annu Proc Assoc Adv Automot Med*. 2000;44:335-46.

34 Romano E, Torres-Saavedra PA, Calderón Cartagena HI, Voas RB, Ramírez A. Alcohol-Related Risk of Driver Fatalities in Motor Vehicle Crashes: Comparing Data From 2007 and 2013-2014. *J Stud Alcohol Drugs*. 2018 Jul;79(4):547-552.

35 Lenguerrand E, Martin JL, Moskal A, Gadegbeku B, Laumon B. Limits of the quasi-induced exposure method when compared with the standard case-control design. Application to the estimation of risks associated with driving under the influence of cannabis or alcohol. *Accid Anal Prev*. 2008;40(3):861-8.

36 Blais É, Bellavance F, Marcil A, Carnis L. Effects of introducing an administrative .05% blood alcohol concentration limit on law enforcement patterns and alcohol-related collisions in Canada. *Accid Anal Prev*. 2015 Sep;82:101-11.

37 Brubacher J, Chan H, Asbridge M. Culpability analysis is still a valuable technique. *Int J Epidemiol*. 2014 Feb;43(1):270-2.

38 Rapoport MJ, Weegar K, Kadulina Y, Bédard M, Carr D, Charlton JL, Dow J, Gillespie IA, Hawley CA, Koppel S, McCullagh S. An international study of the quality of national-level guidelines on driving with medical illness. *QJM: An International Journal of Medicine*. 2015 Nov 1;108(11):859-69.

39 van Dijk N, Sprangers MA, Colman N, Boer KR, Wieling W, Linzer M. Clinical factors associated with quality of life in patients with transient loss of consciousness. *J Cardiovasc Electrophysiol*. 2006 Sep;17(9):998-1003.
